# Supplementary material for: Robust colorimetric detection based on the anti-aggregation of gold nanoparticles for bromide in rice samples
Source: Royal Society of Chemistry journal article supplement (doi:10.1039/c8ra03497d), 2018-01-01
Supplement: c8ra03497d1.pdf [file c8ra03497d1.pdf]

## Electronic Supplementary Material

### Robust colorimetric detection based on anti-aggregation of gold nanoparticles for bromide in rice samples

Siwat Paisen,<sup>a,b</sup> Wilairat Cheewasedtham,<sup>b</sup> and Thitima Rujiralai<sup>\*a,b</sup>

<sup>a</sup>Department of Chemistry and Center of Excellence for Innovation in Chemistry, Faculty of Science, Prince of Songkla University, Hat Yai, Songkhla, 90112 Thailand. E-mail: thitima.r@psu.ac.th.

<sup>b</sup>Analytical Chemistry and Environment Research Unit, Division of Chemistry, Department of Science, Faculty of Science and Technology, Prince of Songkla University, Pattani, 94000, Thailand.

**Section 2.2** The concentration of AuNPs was calculated as follows, with the spectrum of 2.5-folds diluted AuNPs solution (Fig. S1).

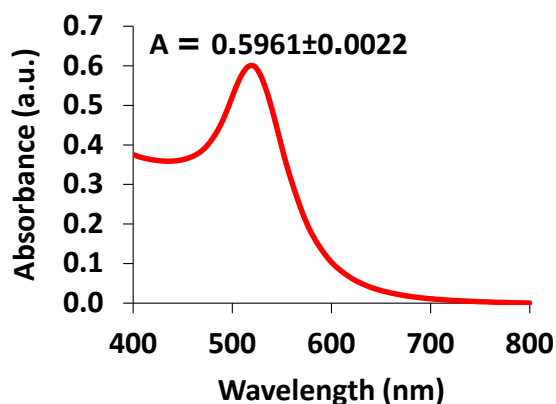

Fig. S1 UV-Vis absorption spectrum of AuNPs solution that is 2.5-folds diluted.

$$A = \epsilon bc$$

$$c = \frac{0.5961}{1 \times 2.70 \times 10^8}$$

$$c = 2.2078 \text{ nM}$$

Thus, the initial concentration of AuNPs is equal to 5.52 nM ( $2.2078 \times 2.5$ -folds dilution)

Where  $A$  is the absorbance of AuNPs solution.

$\epsilon$  is the extinction coefficient of AuNPs at 520 nm which is equal to  $2.70 \times 10^8 \text{ M}^{-1} \text{ cm}^{-1}$  [23].

$b$  is cell pathlength that is equal 1 cm.

$c$  is the concentration of gold nanoparticles.

[23] D. Liu, Z. Wang and X. Jiang, *Nanoscale*, 2011, **3**, 1421–1433.

The stability of gold nanoparticles after several days for detection of bromide ion was investigated. The AuNPs were synthesized, stored in the dark at 4 °C and used for detection of 2.50 μM Br<sup>-</sup> standard within 4 months. The sensitivity of Br<sup>-</sup> detection represented as the absorbance ratio of A<sub>519</sub>/A<sub>673</sub> was recorded (Fig. S2). We measured the absorbance response of Br<sup>-</sup> detection in total of 8 times during 4 months. As shown in Fig. S2, the sensitivity remained stable and no significant difference of the absorbance ratio between 8 measurements in 4 months (*P*>0.05). Thus, it was proved that the stability of AuNPs after several days for Br<sup>-</sup> detection can be last at least 4 months.

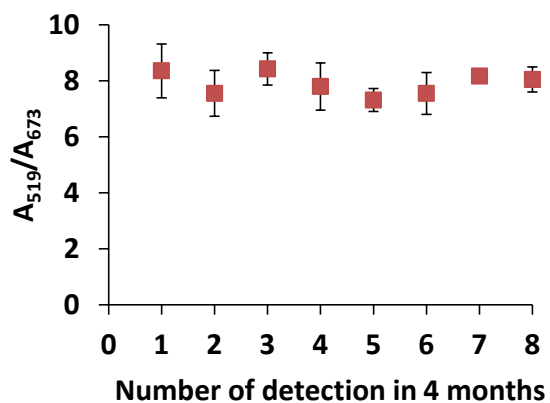

**Fig. S2** The absorbance ratio ( $A_{519}/A_{673}$ ) of 2.50 μM Br<sup>-</sup> after using the synthesized AuNPs suspension stored in the dark at 4 °C in 4 months.

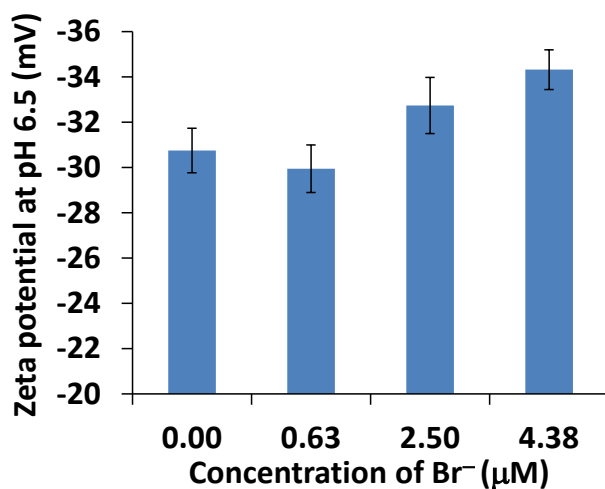

**Fig. S3** Zeta potential of AuNPs at pH 6.5 in the presence of 0.63, 2.50 and 4.38 μM Br<sup>-</sup>.

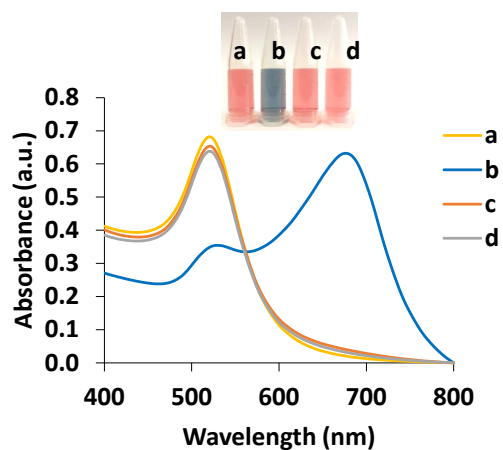

**Fig. S4** UV-Vis absorption spectra of (a) AuNPs, (b) AuNPs+50  $\mu\text{M}$   $\text{Cr}^{3+}$ , (c) AuNPs+50  $\mu\text{M}$   $\text{Fe}^{3+}$  and (d) AuNPs+50  $\mu\text{M}$   $\text{Al}^{3+}$  prepared in 10 mM phosphate buffer (pH 7.0). Inset is the corresponding photograph of a-d.

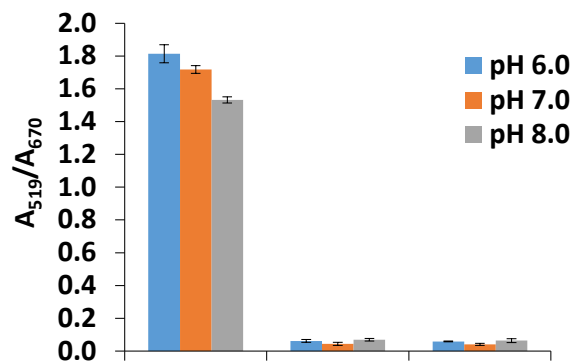

**Fig. S5** Effect of pH of phosphate buffer on aggregation of AuNPs in the presence of  $\text{Cr}^{3+}$ ,  $\text{Fe}^{3+}$  and  $\text{Al}^{3+}$ .

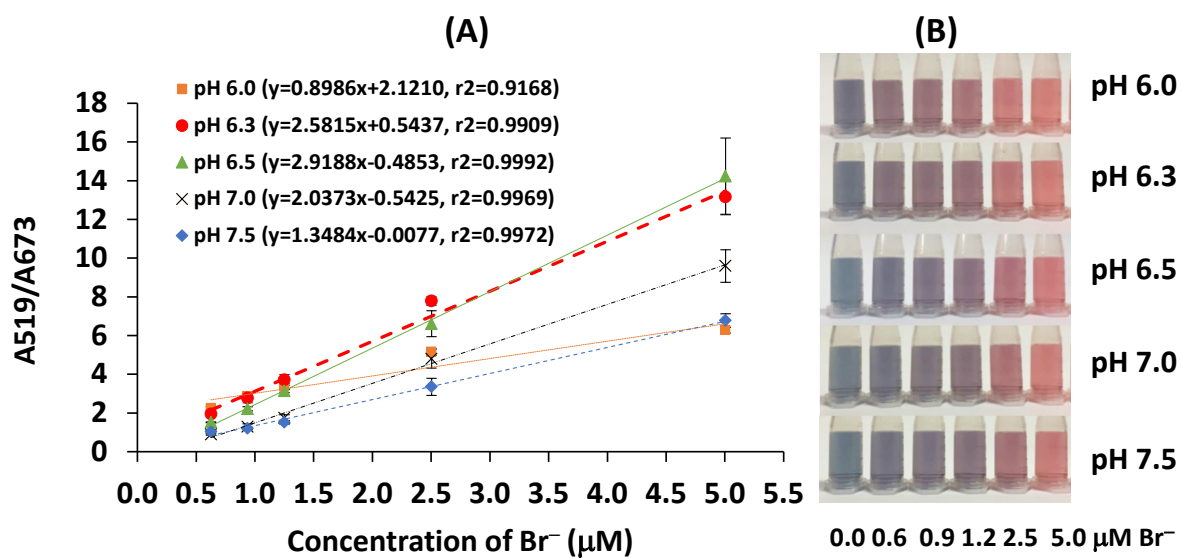

**Fig. S6** (A) The effect of pH of phosphate buffer on the linearity curve of  $\text{Br}^-$  concentration ranged from 0.62–5.01  $\mu\text{M}$  and (B) the corresponding solution color at each pH.

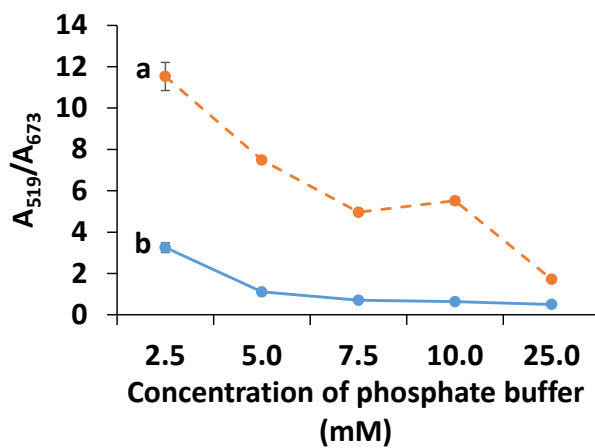

**Fig. S7** The effect of phosphate buffer concentration (pH 6.5) (a) Analyte signal ( $0.25 \mu\text{M Br}^-$ ) and (b) Blank signal (no  $\text{Br}^-$ ).

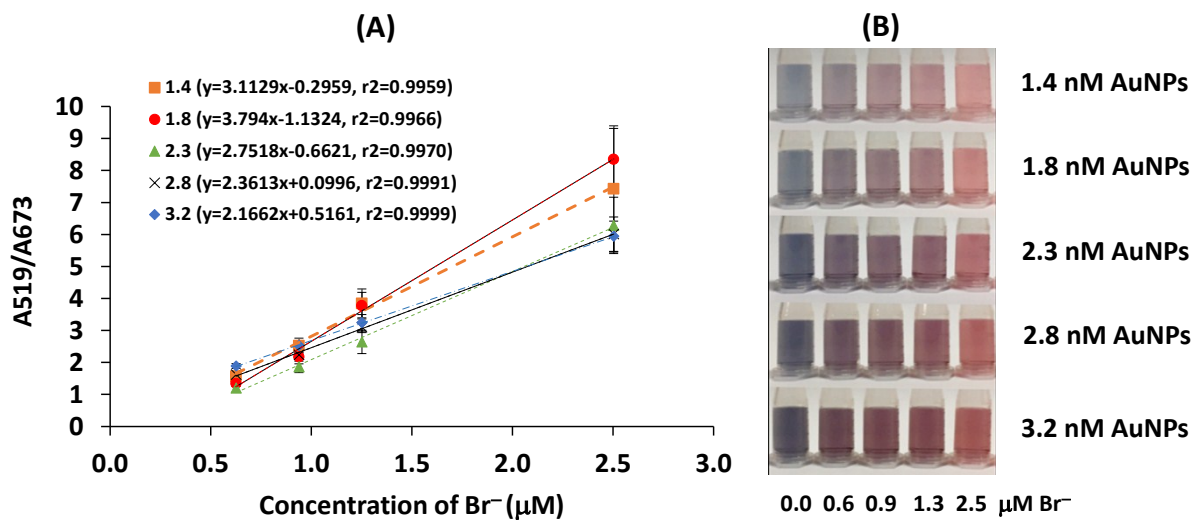

**Fig. S8** (A) The effect of concentration of AuNPs on the linearity curve of  $\text{Br}^-$  concentration ranged from 0.63–2.50  $\mu\text{M}$  and (B) the corresponding solution color at each AuNPs.

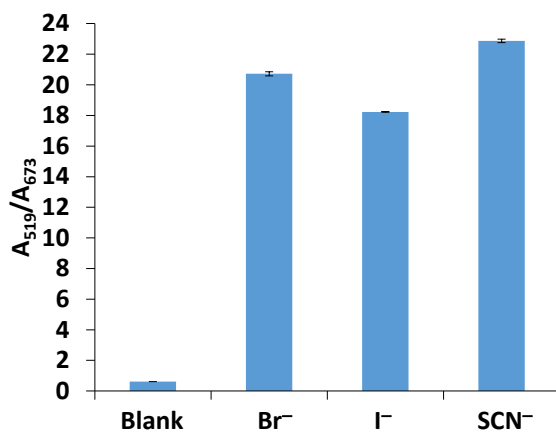

**Fig. S9** Effect of 5 M of  $\text{I}^-$  and  $\text{SCN}^-$  on selectivity of the detection of 5 M  $\text{Br}^-$ .

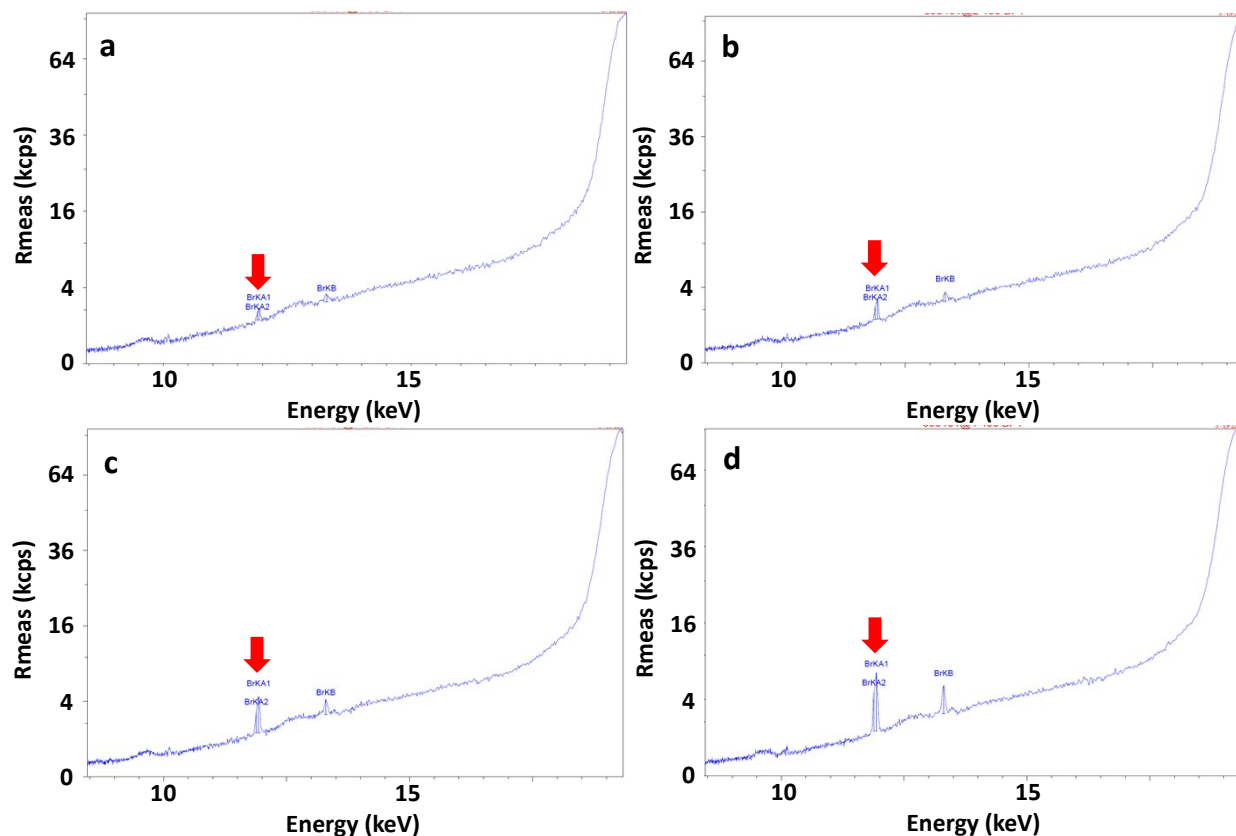

Fig. S10 XRF spectra of sample solutions spiked with (a) 50, (b) 100, (c) 200 and (d) 400 M Br<sup>-</sup>.

Table S1 Comparison of metals detected in rice sample which prepared by different digestion method followed by inductively coupled plasma-optical emission spectrometry (ICP-OES) (n = 3)

| Metal | Sample 1 (mg kg <sup>-1</sup> ) <sup>a</sup> | Sample 2 (mg kg <sup>-1</sup> ) <sup>b</sup> | Sample 3 (mg kg <sup>-1</sup> ) <sup>c</sup> |
|-------|----------------------------------------------|----------------------------------------------|----------------------------------------------|
| Al    | 0.0016 ± 0.0001                              | 0.0028 ± 0.0000                              | 1.0808 ± 0.0228                              |
| Ca    | 0.0068 ± 0.0001                              | 0.0067 ± 0.0002                              | 25.4417 ± 0.4185                             |
| Cr    | 0.0005 ± 0.0000                              | 0.0003 ± 0.0000                              | 0.0211 ± 0.0000                              |
| Cu    | Not detected                                 | Not detected                                 | 0.2564 ± 0.0077                              |
| Fe    | Not detected                                 | Not detected                                 | 0.6846 ± 0.0033                              |
| K     | 13.0542 ± 0.0520                             | 13.5542 ± 0.0764                             | 90.5528 ± 6.2761                             |
| Mg    | 0.0455 ± 0.00012                             | 0.0547 ± 0.0007                              | 24.9431 ± 0.3996                             |
| Mn    | Not detected                                 | Not detected                                 | 1.1388 ± 0.0203                              |
| Ni    | Not detected                                 | Not detected                                 | 0.0266 ± 0.0009                              |
| P     | 1.0049 ± 0.0147                              | 0.9815 ± 0.0113                              | 192.3577 ± 3.2884                            |
| Se    | 0.0002 ± 0.0000                              | 0.0002 ± 0.0001                              | 0.3111 ± 0.0156                              |
| Zn    | Not detected                                 | Not detected                                 | 2.3366 ± 0.0235                              |

<sup>a</sup>rice sample (2.0 g) prepared by digesting with 1% potassium hydroxide in 50% ethanol and ashing for 4 h.

<sup>b</sup>rice sample (2.0 g) prepared by digesting with 1% potassium hydroxide in 50% ethanol and ashing for 8 h.

<sup>c</sup>rice sample (1.2 g) prepared by acidic digesting with hydrogen peroxide and hydrochloric acid.
